# Supplementary material for: Abundant Species Diversity and Essential Functions of Bacterial Communities Associated with Dinoflagellates as Revealed from Metabarcoding Sequencing for Laboratory-Raised Clonal Cultures
Source: Int J Environ Res Public Health. 2022 Apr 7;19(8):4446. doi: 10.3390/ijerph19084446 (PMC9024509; doi:10.3390/ijerph19084446)
Supplement: Supplementary file 1 [file ijerph-19-04446-s001.zip › Supplementary Tables.xlsx]

## Sheet: Table S1
Table S1. General information of the 144 strains of clonal cultures of microalgae
Sample ID	Genus/species	Strain number	Origin	Isolation date	Antibiotics*	Grouping 1		Grouping 3
KM1	Karenia mikimotoi	CCMA83	China	2012	+	DINO	Anti	Athecate
KF1	Kryptoperidinium foliaceum	Southold DINO #8	USA	2009	+	DINO	Anti	Thecate
KA	Karlodinium australe	Karlodinium KaJb05	Maylasia	2015	-	DINO	N-Anti	Athecate
ALA1	Aureoumbra lagunensis	BTIL FL#5	USA	2012	+	N-DINO	Anti
W6	Heterocapsa philippinensis	AT1	Singapore	2001	+	DINO	Anti	Thecate
KM2	Karenia mikimotoi	CCMA28	China	2012	+	DINO	Anti	Athecate
OV	Oltmannsiellopsis viridis	Oltmannsiellopsis virids	China	2014	+	N-DINO	Anti
MU1	Microglena uva-maris	Microglena uva-maris-2	China	2014	+	N-DINO	Anti
MU2	Microglena uva-maris	Microglena uva-maris-1	China	2014	+	N-DINO	Anti
AA	Aureococcus anophagefferens	CCMP1984	USA	1986	+	N-DINO	Anti
W12	Torquentidium helix	JCB_C3 C05	China	2019	+	DINO	Anti	Athecate
ALA2	Aureoumbra lagunensis	BTCB	Cuba	2013	+	N-DINO	Anti
ALA3	Aureoumbra lagunensis	BTIL	USA	2012	+	N-DINO	Anti
W15	Prorocentrum micans	PMJZB-2	China	2015	+	DINO	Anti	Thecate
PGE1	Pseudocochlodinium profundisulcus	G1115	China	2017	+	DINO	Anti	Athecate
PGE2	Pseudocochlodinium profundisulcus	DN	Ballast tank sediment	2018	+	DINO	Anti	Athecate
MP1	Margalefidinium polykrikoides	C.P.	South Korea	2017	+	DINO	Anti	Athecate
HA1	Heterosigma akashiwo	HA1	USA	2011	-	N-DINO	N-Anti
HA2	Heterosigma akashiwo	HA2	USA	2011	-	N-DINO	N-Anti
AS1	Akashiwo sanguinea	ASND-1	China	2016	+	DINO	Anti	Athecate
AS2	Akashiwo sanguinea	ASND-2	China	2016	+	DINO	Anti	Athecate
MF	Margalefidinium fulvescens	MFXG	China	2015	+	DINO	Anti	Athecate
W24	Pelagodinium beii	DY6	China	2020	+	DINO	Anti	Athecate
W25	Biecheleriopsis adriatica	DY4	China	2020	+	DINO	Anti	Athecate
W26	Scrippsiella plana	DY2	China	2020	+	DINO	Anti	Thecate
W27	Scrippsiella plana	DY3	China	2020	+	DINO	Anti	Thecate
PGL	Phaeocystis globosa	PG2015	China	2015	+	N-DINO	Anti
BB1	Biecheleria brevisulcata	NJD5	China	2015	+	DINO	Anti	Athecate
BB2	Biecheleria brevisulcata	NJD7	China	2015	+	DINO	Anti	Athecate
KV1	Karlodinium veneficum	KVND 1 cyst	China	2016	-	DINO	N-Anti	Athecate
W32	Prorocentrum micans	JZBXG03	China	2019	+	DINO	Anti	Thecate
KV2	Karlodinium veneficum	KVND1	China	2016	-	DINO	N-Anti	Athecate
W34	Biecheleria brevisulcata	LYG02	China	2018	+	DINO	Anti	Athecate
W35	Heterocapsa triquetra	TDW19	China	2015	+	DINO	Anti	Thecate
KM3	Karenia mikimotoi	KMND-2	China	2016	+	DINO	Anti	Athecate
W37	Torquentidium helix	JZBBDX04	China	2019	+	DINO	Anti	Athecate
CM	Chattonella marina	Chatt. marina	Singapore	2001	+	N-DINO	Anti
W39	Wangodinium sinense	JZB water sample	China	2016	+	DINO	Anti	Athecate
W40	Biecheleriopsis adriatica	BDH water sample	China	2015	+	DINO	Anti	Athecate
KV3	Karlodinium veneficum	KVBDH-1	China	2014	-	DINO	N-Anti	Athecate
KV4	Karlodinium veneficum	KV7+8	USA	2006	-	DINO	N-Anti	Athecate
W43	Pseliodinium fusus	JZB C3 A5	China	2019	-	DINO	N-Anti	Athecate
W44	Pseliodinium fusus	JZB C3 A14	China	2019	-	DINO	N-Anti	Athecate
W45	Pseliodinium fusus	JZB C3 A13	China	2019	-	DINO	N-Anti	Athecate
W46	Pseliodinium fusus	JZB C3 A11	China	2019	-	DINO	N-Anti	Athecate
W47	Pseliodinium fusus	JZB C3 A19	China	2019	-	DINO	N-Anti	Athecate
W48	Pseliodinium fusus	JZB C3 A18	China	2019	-	DINO	N-Anti	Athecate
W49	Pseliodinium fusus	JZB C3 A17	China	2019	-	DINO	N-Anti	Athecate
APS	Alexandrium pseudogonyaulax	A. pseudogonyaulax LXH	China	2020	-	DINO	N-Anti	Thecate
ALE1	Alexandrium affine	AA LXH	China	2020	-	DINO	N-Anti	Thecate
APA1	Alexandrium pacificum	APNJD-1	China	2015	-	DINO	N-Anti	Thecate
APA2	Alexandrium pacificum	APNJD-2	China	2015	-	DINO	N-Anti	Thecate
AS3	Akashiwo sanguinea	CCMA256	China	2011	+	DINO	Anti	Athecate
AS4	Akashiwo sanguinea	ASNP-6	USA	2011	+	DINO	Anti	Athecate
FJ	Fibrocapsa japonica	Fibrol	Singapore	2001	+	N-DINO	Anti
W57	Symbiodinium sp.	Symbiodinium (SJNU)	China	?	+	DINO	Anti	Thecate
W58	Prorocentrum triestinum	PMBDH-2	China	2015	+	DINO	Anti	Thecate
W59	Prorocentrum triestinum	PMBDH-1	China	2015	+	DINO	Anti	Thecate
MP2	Margalefidinium polykrikoides	CP1	USA	2006	+	DINO	Anti	Athecate
MP3	Margalefidinium polykrikoides	CPSB-1B	USA	2010	+	DINO	Anti	Athecate
MP4	Margalefidinium polykrikoides	COKK23	Maylasia	2014	+	DINO	Anti	Athecate
W63	Karlodinium decipens	JZBC3 B07	China	2019	-	DINO	N-Anti	Athecate
W64	Karlodinium decipens	JZBC3 B08	China	2019	-	DINO	N-Anti	Athecate
W65	Karlodinium decipens	JZBC3 B09	China	2019	-	DINO	N-Anti	Athecate
W66	Karlodinium decipens	JZBC3 B10	China	2019	-	DINO	N-Anti	Athecate
W67	Karlodinium decipens	JZBC3 B11	China	2019	-	DINO	N-Anti	Athecate
W68	Karlodinium decipens	JZBC3 B01	China	2019	-	DINO	N-Anti	Athecate
W69	Karlodinium decipens	JZBC3 B02	China	2019	-	DINO	N-Anti	Athecate
W70	Karlodinium decipens	JZBC3 B03	China	2019	-	DINO	N-Anti	Athecate
W71	Karlodinium decipens	JZBC3 B04	China	2019	-	DINO	N-Anti	Athecate
W72	Karlodinium decipens	JZBC3 B05	China	2019	-	DINO	N-Anti	Athecate
W73	Karlodinium decipens	JZBC3 B06	China	2019	-	DINO	N-Anti	Athecate
KV5	Karlodinium veneficum	KVJZBXG02	China	2019	-	DINO	N-Anti	Athecate
KV6	Karlodinium veneficum	KVJZBXG01	China	2019	-	DINO	N-Anti	Athecate
KV7	Karlodinium veneficum	DYKV7	China	2020	-	DINO	N-Anti	Athecate
KV8	Karlodinium veneficum	KVJZBXG2020-8	China	2020	-	DINO	N-Anti	Athecate
KV9	Karlodinium veneficum	I-K1 KV	China	2019	-	DINO	N-Anti	Athecate
KV10	Karlodinium veneficum	KVJZBXG04	China	2019	-	DINO	N-Anti	Athecate
KV11	Karlodinium veneficum	KVJZBXG05	China	2019	-	DINO	N-Anti	Athecate
KV12	Karlodinium veneficum	KVJZBXG06	China	2019	-	DINO	N-Anti	Athecate
KV13	Karlodinium veneficum	KVJZBXG07	China	2019	-	DINO	N-Anti	Athecate
KV14	Karlodinium veneficum	KVJZBXG08	China	2019	-	DINO	N-Anti	Athecate
KV15	Karlodinium veneficum	KVJZBXG09	China	2019	-	DINO	N-Anti	Athecate
KV16	Karlodinium veneficum	KVPRE-1	China	2011	-	DINO	N-Anti	Athecate
AS5	Akashiwo sanguinea	ASNP-2	USA	2011	+	DINO	Anti	Athecate
PP	Pseliodinium pirum	CHJZB-1	China	2015	+	DINO	Anti	Athecate
IG	Isochrysis galbana	T-ISO	Tahiti	?	+	N-DINO	Anti
GM1	Gymnodinium microreticulatum	DD5	China	2018	+	DINO	Anti	Athecate
AAN1	Alexandrium andersonii	DD4	China	2018	-	DINO	N-Anti	Thecate
AAN2	Alexandrium andersonii	DD2	China	2018	-	DINO	N-Anti	Thecate
GM2	Gymnodinium microreticulatum	DD10	China	2018	+	DINO	Anti	Athecate
GM3	Gymnodinium microreticulatum	DD9	China	2018	+	DINO	Anti	Athecate
GM4	Gymnodinium microreticulatum	DD7	China	2018	+	DINO	Anti	Athecate
GM5	Gymnodinium microreticulatum	DD6	China	2018	+	DINO	Anti	Athecate
AS6	Akashiwo sanguinea	ASNP-2 20200927	USA	2011	+	DINO	Anti	Athecate
AS7	Akashiwo sanguinea	ASNP-2 20201013	USA	2011	+	DINO	Anti	Athecate
AS8	Akashiwo sanguinea	ASNP-2 20201026	USA	2011	+	DINO	Anti	Athecate
W99	Biecheleria brevisulcata	BBND-1	China	2018	+	DINO	Anti	Athecate
W100	Azadinium spinosum	APND-1	China	2018	+	DINO	Anti	Thecate
AAN3	Alexandrium andersonii	DD1	China	2018	-	DINO	N-Anti	Thecate
KPA	Karenia papilionacea	JZBD6-2020-3	China	2020	+	DINO	Anti	Athecate
GT	Gymnodinium trapeziforme	JZBD6-2020-13	China	2020	+	DINO	Anti	Athecate
PM1	Prorocentrum minimum	PMMHC-2	USA	2011	+	DINO	Anti	Thecate
PM2	Prorocentrum minimum	PMMHC-1	USA	2011	+	DINO	Anti	Thecate
PD1	Prorocentrum donghaiense	CCMA264	China	2010	+	DINO	Anti	Thecate
PD2	Prorocentrum donghaiense	CCMA206	China	2014	+	DINO	Anti	Thecate
W108	Biecheleria brevisulcata	S06-2 0-2cm 1	China	2020	+	DINO	Anti	Athecate
ST	Scrippsiella trochoidea	STIOCAS-1	China	?	+	DINO	Anti	Thecate
GI1	Gymnodinium impudicum	GIJZB-3	China	2014	+	DINO	Anti	Athecate
GI2	Gymnodinium impudicum	GIJZB-1	China	2014	+	DINO	Anti	Athecate
KB	Karenia brevis	CCMA27 KB	？	2002	+	DINO	Anti	Athecate
KV17	Karlodinium veneficum	P4-1	China	2018	-	DINO	N-Anti	Athecate
KV18	Karlodinium veneficum	P4-2	China	2018	-	DINO	N-Anti	Athecate
KV19	Karlodinium veneficum	P4-3	China	2018	-	DINO	N-Anti	Athecate
W116	Scrippsiella trochoidea	S06-2 0-2cm 3	China	2020	+	DINO	Anti	Thecate
GC1	Gymnodinium catenatum	GCTIO523	China	2018	+	DINO	Anti	Athecate
GC2	Gymnodinium catenatum	GCTIO527	China	2018	+	DINO	Anti	Athecate
ALE2	Alexandrium leei	ALKP06	Maylasia	2016	-	DINO	N-Anti	Thecate
ALE3	Alexandrium leei	ALKP07	Maylasia	2016	-	DINO	N-Anti	Thecate
PM3	Prorocentrum minimum	CCMA262 P. minimum	China	2010	+	DINO	Anti	Athecate
W123	Symbiodinium sp.	CCMA128	China		+	DINO	Anti	Thecate
PM4	Alexandrium mimutum	CCMA127 A. mimutum	China		-	DINO	N-Anti	Thecate
W125	Karlodinium decipens	JZBC3 B14	China	2019	-	DINO	N-Anti	Athecate
W126	Pseliodinium fusus	JZBC3 C1	China	2019	+	DINO	Anti	Athecate
W127	Biecheleriopsis adriatica	S06-2 42-44cm 21	China	2020	+	DINO	Anti	Athecate
W128	Scrippsiella_donghaienis	S06-2 42-44cm 23 20201112	China	2020	+	DINO	Anti	Thecate
W129	Scrippsiella_donghaienis	S06-2 42-44cm 23 20201128	China	2020	+	DINO	Anti	Thecate
W130	Scrippsiella_donghaienis	S06-2 42-44cm 23 20201219	China	2020	+	DINO	Anti	Thecate
W131	Pseliodinium fusus	JZBC3 A10	China	2019	-	DINO	N-Anti	Athecate
W132	Pseliodinium fusus	JZBC3 A8	China	2019	-	DINO	N-Anti	Athecate
W133	Pseliodinium fusus	JZBC3 A7	China	2019	-	DINO	N-Anti	Athecate
W134	Pseliodinium fusus	JZBC3 A6	China	2019	-	DINO	N-Anti	Athecate
W135	Pseliodinium fusus	JZBC3 A5	China	2019	-	DINO	N-Anti	Athecate
W136	Pseliodinium fusus	JZBC3 A2	China	2019	-	DINO	N-Anti	Athecate
W137	Pseliodinium fusus	JZBC3 A1	China	2019	-	DINO	N-Anti	Athecate
PH	Pheopolykrikos hartmannii	PHJZB2017-5	China	2017	+	DINO	Anti	Athecate
W139	Rhodomonas salina	CCMP1319	USA	1956	+	N-DINO	Anti
W140	Scrippsiella sp.	Wellington N8	New Zeland	2016	+	DINO	Anti	Thecate
AIN1	Alexandrium insuetum	Lian cyst 023 AI	China	2018	-	DINO	N-Anti	Thecate
AIN2	Alexandrium insuetum	Lian cyst 012 AI	China	2018	-	DINO	N-Anti	Thecate
W144	Biecheleria brevisulcata	D.d cell 2-020	China	2018	+	DINO	Anti	Athecate
W146	Scrippsiella trochoidea	D.d cell 2-018	China	2018	+	DINO	Anti	Thecate
W147	Scrippsiella trochoidea	D.d cell 2-019	China	2018	+	DINO	Anti	Thecate
W148	Azadinium poporum	D.d cell 2-06	China	2018	+	DINO	Anti	Thecate
* "+": A penicillin-streptomycin solution (100×, Solarbio, Beijing, China) with final concentration of 2-3% was added into the medium immediately before inoculation; "NA": No antibiotic was added in the culture.

## Sheet: Table S2
Table S2. The statistics of obtained sequences data of 16S rRNA gene amplicon sequencing in the present study
Sample ID	Raw Tags	Raw Bases	Valid Tags	Valid Bases	Valid%	Q20%	Q30%	GC%
KM1	81989	40.99M	62643	25.72M	76.4	98.11	94.32	54.06
KF1	85551	42.78M	77213	31.26M	90.25	98.44	95.01	54.31
KA	86095	43.05M	78204	33.26M	90.83	97.94	93.57	52.11
ALA1	80354	40.18M	74247	30.57M	92.4	98	93.49	51.22
W6	84384	42.19M	82274	33.51M	97.5	98.39	94.8	53.21
KM2	83278	41.64M	79473	33.79M	95.43	98.03	93.62	49.59
OV	80619	40.31M	67282	28.63M	83.46	97.3	91.89	53.44
MU1	82538	41.27M	73136	29.82M	88.61	98.32	94.63	54.66
MU2	83101	41.55M	79617	32.29M	95.81	98.29	94.73	54.8
AA	85864	42.93M	64241	26.61M	74.82	97.8	93.25	52.61
W12	84321	42.16M	71367	29.94M	84.64	98.16	94.28	53.2
ALA2	80792	40.40M	70009	29.23M	86.65	98.14	94.2	51.9
ALA3	83492	41.75M	69454	28.82M	83.19	98.19	94.43	52.72
W15	87071	43.54M	80049	33.55M	91.94	98.36	94.75	53.28
PGE1	84531	42.27M	74354	31.40M	87.96	98.48	95.06	53.28
PGE2	80164	40.08M	66999	28.17M	83.58	98.24	94.41	52.78
MP1	86759	43.38M	78517	33.18M	90.5	98.25	94.69	53.61
HA1	85139	42.57M	75795	31.08M	89.03	98.26	94.44	50.48
HA2	87811	43.91M	81199	33.22M	92.47	98.07	93.75	49.01
AS1	86050	43.02M	65868	27.34M	76.55	98.34	94.71	52.99
AS2	86191	43.10M	74075	31.49M	85.94	98.2	94.46	52.89
MF	83849	41.92M	76443	32.42M	91.17	98.23	94.37	52.18
W24	87485	43.74M	80999	34.54M	92.59	98.35	94.59	51.95
W25	85490	42.74M	78305	32.60M	91.6	97.98	93.59	53.74
W26	80573	40.29M	70968	29.31M	88.08	98.08	94.02	53.97
W27	87184	43.59M	72676	30.60M	83.36	95.13	86.83	52.81
PGL	82152	41.08M	75420	30.85M	91.81	97.81	93.11	52.53
BB1	84701	42.35M	78985	33.10M	93.25	98.06	93.84	53.01
BB2	82141	41.07M	71114	30.03M	86.58	98.25	94.51	52.92
KV1	84653	42.33M	76566	31.91M	90.45	98.25	94.36	53.1
W32	86299	43.15M	73313	31.19M	84.95	98.2	94.24	52.51
KV2	84954	42.48M	75224	31.28M	88.55	98.32	94.68	52.84
W34	87302	43.65M	81531	33.74M	93.39	98.23	94.51	52.83
W35	87312	43.66M	83788	33.87M	95.96	98.52	95.2	53.89
KM3	80876	40.44M	69171	29.37M	85.53	98.08	94	52.93
W37	83780	41.89M	75430	31.46M	90.03	98.2	94.31	53.02
CM	82939	41.47M	77366	31.59M	93.28	98.2	94.22	49.82
W39	82552	41.28M	73162	30.43M	88.63	98.45	94.96	52.62
W40	81826	40.91M	73506	30.74M	89.83	98.41	94.7	52.93
KV3	80885	40.44M	69675	29.12M	86.14	98.13	94.22	53
KV4	87023	43.51M	67158	28.18M	77.17	98.03	94.16	53.11
W43	84731	42.37M	71892	30.62M	84.85	98.02	94.09	52.54
W44	82861	41.43M	72841	31.05M	87.91	97.95	93.8	52.31
W45	87488	43.74M	79541	33.88M	90.92	97.98	93.9	52.86
W46	84873	42.44M	74850	31.36M	88.19	98.18	94.45	52.79
W47	86337	43.17M	74389	31.65M	86.16	98.12	94.18	52.4
W48	85902	42.95M	75047	31.49M	87.36	98.4	94.86	52.8
W49	84041	42.02M	70555	29.90M	83.95	97.25	91.76	52.42
APS	81430	40.72M	74735	31.79M	91.78	97.29	91.98	52.58
ALE1	84845	42.42M	68242	29.04M	80.43	96.87	90.95	52.69
APA1	87833	43.92M	71810	30.55M	81.76	97.99	93.83	53.2
APA2	80285	40.14M	72206	30.41M	89.94	98.07	94.07	52.84
AS3	82835	41.42M	66763	28.10M	80.6	98.07	94.13	53.54
AS4	85444	42.72M	70196	29.40M	82.15	98.36	94.74	53.01
FJ	82932	41.47M	78577	32.30M	94.75	97.21	91.62	50.92
W57	84475	42.24M	77447	31.44M	91.68	98.58	95.41	53.93
W58	84548	42.27M	72983	30.83M	86.32	98.26	94.73	52.59
W59	80391	40.20M	69192	29.13M	86.07	98.46	95.18	52.82
MP2	85514	42.76M	74208	31.18M	86.78	98.36	94.88	52.97
MP3	82341	41.17M	72860	30.43M	88.49	98.42	95.05	52.98
MP4	84404	42.20M	72850	30.91M	86.31	98.35	94.89	52.38
W63	80762	40.38M	73038	31.12M	90.44	98.27	94.65	53.12
W64	82372	41.19M	73875	31.49M	89.68	98.42	94.89	53.13
W65	85564	42.78M	79416	33.88M	92.81	98.17	94.33	53.11
W66	82410	41.20M	73609	31.37M	89.32	98.02	94.06	53.16
W67	80651	40.33M	73739	31.45M	91.43	98.2	94.6	53.07
W68	87099	43.55M	79423	33.83M	91.19	98.13	94.24	53.47
W69	83579	41.79M	74955	31.98M	89.68	97.9	93.48	53.07
W70	84771	42.39M	76610	32.68M	90.37	98.26	94.76	53.55
W71	81446	40.72M	75805	32.34M	93.07	98.23	94.56	53.42
W72	86082	43.04M	79503	33.87M	92.36	98.33	94.71	53.08
W73	85801	42.90M	72694	31.01M	84.72	98.41	95.06	53.47
KV5	80442	40.22M	73867	30.90M	91.83	98.27	94.66	53.08
KV6	84358	42.18M	78223	32.49M	92.73	98.24	94.57	53.65
KV7	83920	41.96M	75989	31.69M	90.55	97.92	93.37	52.53
KV8	86144	43.07M	73889	29.04M	85.77	98.5	95.21	51.12
KV9	83571	41.79M	68297	29.02M	81.72	98.32	94.91	53
KV10	85416	42.71M	73294	31.23M	85.81	98.36	94.74	52.55
KV11	86546	43.27M	70478	29.81M	81.43	98.49	95.03	52.29
KV12	83327	41.66M	70495	29.96M	84.6	98.16	94.26	52.64
KV13	84394	42.20M	72409	30.81M	85.8	98.1	94.4	52.63
KV14	82431	41.22M	68977	29.30M	83.68	98.24	94.67	52.45
KV15	83478	41.74M	71553	30.50M	85.71	98.15	94.35	52.63
KV16	87422	43.71M	81498	34.31M	93.22	98.18	94.44	53.35
AS5	86583	43.29M	78895	33.60M	91.12	98.36	95.06	53.47
PP	80999	40.50M	74564	31.33M	92.06	98.26	94.52	52.74
IG	82265	41.13M	79460	32.41M	96.59	98.31	94.39	49.08
GM1	81006	40.50M	72642	30.92M	89.67	98.3	94.71	52.62
AAN1	83224	41.61M	76771	32.73M	92.25	98.29	95	53.5
AAN2	84120	42.06M	77842	33.13M	92.54	98.41	95.15	52.81
GM2	82631	41.32M	78655	33.07M	95.19	98.33	94.93	52.93
GM3	87701	43.85M	83263	34.91M	94.94	98.4	95.03	53.18
GM4	84207	42.10M	75548	32.08M	89.72	98.36	95.11	53.43
GM5	82671	41.34M	72580	30.59M	87.79	98.37	94.87	52.83
AS6	57423	28.71M	56494	23.86M	98.38	98.4	95	52.51
AS7	57075	28.54M	55974	23.28M	98.07	98.13	94.32	52.43
AS8	80326	40.16M	67622	28.64M	84.18	98.21	94.8	53.13
W99	85640	42.82M	78714	33.14M	91.91	98.44	95.23	53.29
W100	80165	40.08M	71137	30.12M	88.74	98.41	95.13	52.96
AAN3	86014	43.01M	78391	32.99M	91.14	98.3	94.79	52.92
KPA	82762	41.38M	75575	31.75M	91.32	98.36	95.02	53.64
GT	83464	41.73M	81349	34.68M	97.47	98.3	94.65	52.76
PM1	81151	40.58M	70092	29.79M	86.37	98.46	95.08	52.96
PM2	81203	40.60M	68762	28.54M	84.68	98.13	94.17	53.39
PD1	86925	43.46M	84280	35.88M	96.96	97.82	93.51	52.8
PD2	80966	40.48M	71572	30.51M	88.4	97.84	93.68	52.87
W108	81754	40.88M	69465	29.31M	84.97	97.44	92.45	53.15
ST	86579	43.29M	70334	29.76M	81.24	97.93	93.78	52.56
GI1	80309	40.15M	71250	29.86M	88.72	98.09	94.22	53.5
GI2	81472	40.74M	68708	28.89M	84.33	98.16	94.33	52.93
KB	80068	40.03M	66100	27.97M	82.55	98.25	94.45	52.66
KV17	84989	42.49M	71598	30.53M	84.24	98	93.98	52.66
KV18	85921	42.96M	70636	29.93M	82.21	97.88	93.82	52.87
KV19	81408	40.70M	65569	27.84M	80.54	98.05	94.09	53.5
W116	80739	40.37M	64568	26.44M	79.97	98.2	94.49	54.38
GC1	85789	42.89M	75313	31.99M	87.79	98.02	93.94	52.27
GC2	83915	41.96M	72223	30.61M	86.07	97.99	93.94	52
ALE2	81063	40.53M	66342	28.15M	81.84	98.21	94.45	52.6
ALE3	81176	40.59M	64027	27.25M	78.87	98.37	94.78	52.57
PM3	84087	42.04M	80247	33.97M	95.43	98.09	94.22	53.04
W123	84030	42.02M	79743	33.01M	94.9	98.44	95.15	54.24
PM4	86938	43.47M	84680	35.05M	97.4	98.22	94.39	54.13
W125	81246	40.62M	73358	31.28M	90.29	98.07	94.13	52.32
W126	85312	42.66M	78055	32.67M	91.49	98.16	94.48	52.86
W127	85317	42.66M	83532	35.51M	97.91	98.37	94.79	52.47
W128	82313	41.16M	70521	29.76M	85.67	98.47	95.04	52.66
W129	84000	42.00M	76845	32.55M	91.48	97.6	92.7	52.73
W130	85770	42.88M	73124	30.95M	85.26	98.02	94.1	52.73
W131	86706	43.35M	76333	32.52M	88.04	98.12	94.29	52.38
W132	82172	41.09M	72529	30.91M	88.26	97.97	93.84	52.49
W133	83422	41.71M	78828	33.55M	94.49	98.05	94.1	52.46
W134	80957	40.48M	68424	28.95M	84.52	98.07	94.22	52.54
W135	84708	42.35M	71314	30.26M	84.19	98.26	94.59	52.52
W136	86722	43.36M	76720	32.58M	88.47	98.34	94.74	52.51
W137	87604	43.80M	74219	31.55M	84.72	97.87	93.33	52.38
PH	80963	40.48M	74080	31.37M	91.5	98.03	94.01	52.45
W139	85615	42.81M	77507	32.54M	90.53	98.17	94.36	52.62
W140	80713	40.36M	61786	26.09M	76.55	97.84	93.36	52.74
AIN1	81392	40.70M	72555	30.21M	89.14	98.02	93.81	52.79
AIN2	82136	41.07M	70812	29.56M	86.21	98.02	93.99	52.63
W144	87119	43.56M	85189	35.98M	97.78	98.38	94.68	52.57
W146	86547	43.27M	79495	33.66M	91.85	98.12	94.34	52.54
W147	84106	42.05M	74371	31.62M	88.43	98.26	94.65	52.28
W148	83827	41.91M	75077	31.93M	89.56	98.21	94.45	52.17

## Sheet: Table S3
Table S3. Alpha diversity indices (Chao 1, Observed species, Goods coverage, Shannon and Simpson) of all samples
Sample ID	Observed species	Shannon	Simpson	Chao 1	Goods coverage
AA	184	3.79167	0.873737	184.067	0.999962
AAN1	82	2.15029	0.690418	87	0.999811
AAN2	86	2.63091	0.756255	86.5556	0.999906
AAN3	90	3.54268	0.846759	95.1429	0.99983
AIN1	122	2.74082	0.767773	122.6	0.999943
AIN2	137	3.08495	0.782364	137	0.999981
ALA1	98	2.81925	0.794064	99.75	0.999868
ALA2	113	3.04333	0.802104	113.125	0.999962
ALA3	115	3.06865	0.796501	115	0.999981
ALE1	87	2.48655	0.70132	87.5	0.999943
ALE2	119	2.83476	0.717655	120.429	0.999906
ALE3	115	2.61335	0.743295	115.375	0.999943
APA1	106	2.92267	0.795628	106.545	0.999924
APA2	115	2.98576	0.711305	116.667	0.999887
APS	71	2.28517	0.704347	71	0.999981
AS1	132	3.2954	0.787716	132.4	0.999924
AS2	65	2.50722	0.754489	65.0909	0.999962
AS3	95	1.97991	0.543296	95.2308	0.999943
AS4	103	3.32905	0.805828	103.1	0.999962
AS5	82	2.07877	0.670204	82.9091	0.999906
AS6	117	3.26735	0.84096	117	1
AS7	122	3.51309	0.862652	122	1
AS8	97	2.46947	0.7419	97.375	0.999924
BB1	90	3.3936	0.866259	91.1111	0.999906
BB2	87	3.02856	0.773317	87	0.999981
CM	131	1.90307	0.450492	137.067	0.999736
FJ	76	2.50255	0.71234	77.5	0.999924
GC1	94	2.50893	0.679362	95.1538	0.999887
GC2	106	2.88897	0.763309	109	0.999868
GI1	89	2.82251	0.799497	89.2308	0.999943
GI2	122	3.46014	0.836043	122.214	0.999943
GM1	95	2.84884	0.779311	95.625	0.999906
GM2	109	3.19896	0.812944	110.647	0.999849
GM3	88	3.69719	0.888951	89.1538	0.999887
GM4	83	2.98275	0.814942	83.0714	0.999962
GM5	87	3.2156	0.809302	89.1429	0.999887
GT	63	1.7525	0.602728	63.8333	0.999906
HA1	111	2.59797	0.676808	115.5	0.99983
HA2	150	1.8728	0.44471	152.64	0.999773
IG	48	1.04167	0.317993	49.25	0.999906
KA	107	1.55974	0.394989	108.364	0.999887
KB	93	2.92838	0.759692	93.375	0.999943
KF1	80	2.03089	0.585855	83	0.999868
KM1	136	3.51923	0.855034	136	0.999981
KM2	81	2.28258	0.682703	87.1111	0.999792
KM3	117	2.29647	0.569839	119	0.999906
KPA	75	2.6397	0.788354	76.25	0.999887
KV1	113	2.99901	0.775584	113.714	0.999906
KV10	77	2.55894	0.769736	77.8333	0.999906
KV11	124	3.21321	0.80209	124.273	0.999943
KV12	103	2.72694	0.779691	103.714	0.999906
KV13	74	2.68541	0.789644	74.6	0.999924
KV14	105	2.9584	0.806079	105.333	0.999924
KV15	81	2.59728	0.783264	82	0.999924
KV16	96	3.17759	0.779578	96	0.999981
KV17	85	2.12909	0.668776	85	0.999981
KV18	99	2.97081	0.787786	100.25	0.999906
KV19	89	2.79636	0.788679	89.6667	0.999924
KV2	195	4.00522	0.877513	195.261	0.999924
KV3	215	4.28385	0.907227	216.565	0.99983
KV4	244	4.46352	0.907865	244.333	0.999924
KV5	144	3.32497	0.832673	144.588	0.999906
KV6	170	3.54365	0.858529	175.714	0.999698
KV7	265	3.5729	0.791268	266.774	0.999792
KV8	592	4.2552	0.851941	593.529	0.999755
KV9	86	2.293	0.690842	86.125	0.999962
MF	95	1.34289	0.333589	97.1538	0.999849
MP1	85	2.5822	0.762226	85.625	0.999906
MP2	135	3.23488	0.82363	135.062	0.999962
MP3	114	3.13844	0.810085	115.429	0.999906
MP4	75	2.31553	0.653403	77	0.999906
MU1	104	2.47014	0.655768	104.6	0.999924
MU2	89	2.09551	0.571381	89.8333	0.999906
OV	72	2.60526	0.773748	72	0.999981
PD1	67	1.80859	0.610757	68.4	0.999868
PD2	71	1.33978	0.365472	71	1
PGE1	90	3.29131	0.868076	90.4286	0.999943
PGE2	90	3.19983	0.843939	90.375	0.999943
PGL	122	2.94482	0.747651	122.667	0.999906
PH	74	2.36755	0.593025	75.25	0.999906
PM1	72	2.4576	0.687905	72	1
PM2	77	2.64619	0.751966	77.9091	0.999906
PM3	99	2.4065	0.660988	105.5	0.999755
PM4	88	2.70403	0.793369	90.8	0.999849
PP	71	2.83669	0.697619	74.75	0.999887
ST	114	2.70604	0.650188	114.067	0.999962
W100	115	3.34433	0.844553	115.188	0.999943
W108	112	3.16258	0.823161	112	1
W116	96	3.44091	0.840793	96.3333	0.999943
W12	112	3.224	0.81456	116	0.99983
W123	71	2.46525	0.76425	73.1	0.999868
W125	89	2.22277	0.66289	90.3125	0.999868
W126	128	3.31569	0.80775	129.167	0.999868
W127	69	2.36939	0.727775	70.1538	0.999887
W128	78	2.61864	0.685615	78.375	0.999943
W129	74	2.15095	0.662095	77.5	0.999868
W130	83	2.80953	0.80688	84.2	0.999924
W131	69	1.66634	0.56438	70.1111	0.999906
W132	99	2.55668	0.730514	100.154	0.999887
W133	92	2.18963	0.665283	92.1667	0.999943
W134	81	2.80373	0.756164	81.3	0.999943
W135	93	2.72725	0.736643	93.1875	0.999943
W136	88	2.52792	0.705192	90	0.999849
W137	93	2.22311	0.653166	94.6667	0.999906
W139	95	2.77323	0.689692	95	0.999981
W140	83	3.06077	0.812917	83	0.999981
W144	109	3.11985	0.756461	109.25	0.999943
W146	94	2.75481	0.760632	94.7895	0.999887
W147	79	2.65441	0.762817	79.0909	0.999962
W148	82	2.646	0.730857	82.4545	0.999906
W15	72	2.7503	0.798563	72.375	0.999943
W24	75	1.15961	0.283454	75.2	0.999943
W25	100	3.11264	0.776961	100.077	0.999962
W26	114	3.50159	0.846938	114.1	0.999962
W27	64	2.96617	0.801015	64.25	0.999962
W32	81	2.01102	0.635912	81.6	0.999943
W34	94	2.45656	0.706907	96.1429	0.999887
W35	71	0.869932	0.215409	71.375	0.999943
W37	91	3.12403	0.819359	91.2727	0.999943
W39	134	3.52931	0.849743	135.5	0.999924
W40	104	2.96762	0.761547	105.429	0.999906
W43	76	1.8666	0.61306	76	0.999981
W44	77	1.93499	0.584963	77	0.999981
W45	81	2.05671	0.627604	82.25	0.999887
W46	83	2.60383	0.761758	83.4286	0.999943
W47	68	2.0479	0.631184	68.1667	0.999962
W48	88	2.5428	0.751991	88.9091	0.999906
W49	87	2.6318	0.730772	87	0.999981
W57	96	2.09532	0.501191	96	1
W58	91	2.88996	0.778678	91.8571	0.999924
W59	114	3.16963	0.824307	114.75	0.999924
W6	91	2.92489	0.768601	91.8571	0.999924
W63	65	1.83402	0.502328	65.1429	0.999962
W64	60	1.86158	0.507837	60.3333	0.999962
W65	55	1.26475	0.354227	56	0.999924
W66	57	2.12168	0.589875	57	1
W67	44	1.43651	0.387161	44	0.999981
W68	111	2.45407	0.710795	114.474	0.999773
W69	55	2.51021	0.743213	55.1667	0.999962
W70	61	2.64558	0.79365	61.4286	0.999943
W71	54	1.98968	0.628699	54.2	0.999962
W72	72	2.68612	0.767614	75	0.99983
W73	83	2.81899	0.802979	83	0.999981
W99	88	3.44502	0.873815	92.5	0.99983

## Sheet: Table S4
Table S4. Annotation and statistics of different classification levels for the 144 samples
Sample ID	Phylum	Class	Order	Family	Genus	Species	Feature number
KM1	8	13	26	31	40	59	136
KF1	7	9	20	25	30	41	80
KA	8	15	34	44	57	60	108
ALA1	8	12	22	26	33	43	99
W6	8	15	32	40	52	60	92
KM2	7	12	25	31	43	52	82
OV	8	9	18	23	29	40	72
MU1	7	11	24	30	39	48	104
MU2	6	12	24	31	40	48	89
AA	8	14	34	42	62	69	184
W12	7	12	31	39	47	55	112
ALA2	8	11	24	29	38	51	114
ALA3	7	12	24	27	32	45	118
W15	7	10	25	28	33	36	74
PGE1	7	11	24	26	30	43	91
PGE2	7	11	23	30	43	54	91
MP1	7	11	22	28	34	40	85
HA1	6	11	25	33	40	43	113
HA2	7	12	31	47	67	72	154
AS1	6	12	36	52	64	69	133
AS2	6	10	23	28	33	37	65
MF	7	11	22	32	37	46	97
W24	6	10	25	33	39	44	75
W25	5	9	24	35	48	57	100
W26	6	10	22	28	37	47	115
W27	5	9	21	24	28	34	64
PGL	6	11	25	37	52	59	122
BB1	8	12	29	36	45	47	91
BB2	6	9	25	29	37	42	88
KV1	7	11	26	31	42	44	114
W32	6	10	21	24	31	39	81
KV2	8	15	39	55	76	92	196
W34	7	10	23	30	40	48	96
W35	7	11	23	28	34	40	71
KM3	8	13	33	43	53	63	117
W37	6	9	22	30	39	48	93
CM	7	11	26	32	40	47	132
W39	8	11	22	28	40	50	135
W40	7	10	22	29	39	46	105
KV3	9	12	32	44	62	72	216
KV4	7	15	42	62	80	96	245
W43	7	12	23	30	36	39	76
W44	7	10	24	30	39	44	78
W45	6	11	25	31	34	40	82
W46	7	10	22	29	36	41	85
W47	6	9	20	24	27	30	68
W48	7	11	24	30	38	42	88
W49	6	9	23	28	37	40	88
APS	7	10	20	26	33	35	70
ALE1	7	11	24	29	35	43	88
APA1	6	10	27	35	47	59	107
APA2	6	12	27	33	46	53	116
AS3	6	8	21	30	42	46	96
AS4	7	11	23	28	41	56	104
FJ	7	12	21	27	31	39	78
W57	4	9	21	28	39	48	97
W58	6	9	22	28	44	52	91
W59	7	11	24	33	47	62	115
MP2	6	8	23	31	45	53	136
MP3	7	9	21	29	42	50	114
MP4	6	8	21	25	34	37	75
W63	5	8	19	21	26	35	66
W64	5	6	15	18	22	32	60
W65	5	5	14	16	21	32	55
W66	4	5	13	17	21	29	57
W67	4	6	14	16	20	24	44
W68	6	10	28	35	45	54	112
W69	5	8	14	18	22	26	55
W70	5	6	15	19	23	30	63
W71	5	7	15	16	20	25	54
W72	6	9	22	25	28	33	74
W73	7	9	20	26	37	45	86
KV5	6	11	29	39	55	65	146
KV6	7	12	37	50	68	73	175
KV7	9	14	41	54	76	82	268
KV8	16	28	72	139	307	397	592
KV9	5	7	19	23	34	44	88
KV10	6	11	26	29	36	41	78
KV11	7	13	28	32	43	54	125
KV12	7	10	29	38	47	54	105
KV13	5	8	25	29	35	37	74
KV14	8	13	28	36	47	51	105
KV15	6	10	26	31	39	44	82
KV16	7	11	33	39	58	61	96
AS5	6	9	24	33	43	51	83
PP	7	11	23	27	34	42	71
IG	6	8	19	22	25	28	48
GM1	6	12	27	33	49	59	95
AAN1	5	9	22	27	38	45	83
AAN2	7	12	26	35	45	50	88
GM2	8	14	34	44	66	71	110
GM3	7	12	29	36	54	60	89
GM4	7	12	27	34	44	50	84
GM5	6	12	24	30	39	50	88
AS6	8	16	31	44	65	79	116
AS7	7	11	34	50	67	81	121
AS8	7	11	26	38	52	59	98
W99	6	12	25	33	48	54	90
W100	8	12	30	40	58	70	116
AAN3	6	10	26	36	53	61	92
KPA	6	9	19	25	29	36	78
GT	6	11	21	29	35	40	64
PM1	6	8	15	23	28	36	73
PM2	5	7	19	24	33	37	77
PD1	5	10	20	25	40	42	69
PD2	6	10	19	24	33	38	71
W108	6	9	21	27	44	59	112
ST	7	11	24	30	48	60	114
GI1	9	14	21	25	30	40	91
GI2	7	12	22	28	38	43	122
KB	7	13	23	26	31	40	94
KV17	6	9	19	26	37	48	85
KV18	8	12	25	30	35	48	98
KV19	7	10	20	26	30	47	89
W116	7	11	24	29	36	48	97
GC1	7	13	26	35	44	53	95
GC2	7	13	27	32	44	51	105
ALE2	5	9	27	35	45	56	121
ALE3	7	12	27	33	41	50	116
PM3	7	12	23	27	39	46	102
W123	5	9	18	21	27	35	74
PM4	7	12	26	31	42	48	90
W125	7	12	22	26	36	43	92
W126	7	15	31	39	53	63	130
W127	6	9	21	25	39	42	68
W128	7	11	19	21	30	42	79
W129	6	11	21	30	41	46	75
W130	6	10	21	27	38	50	84
W131	6	11	21	26	31	36	69
W132	8	13	27	33	40	48	101
W133	6	12	26	35	51	55	94
W134	6	10	22	30	35	41	82
W135	5	10	20	29	36	45	94
W136	6	10	20	30	38	48	88
W137	8	13	24	30	37	46	94
PH	5	10	21	26	35	44	73
W139	5	12	23	29	42	53	97
W140	8	15	29	35	49	57	83
AIN1	6	10	21	25	35	39	122
AIN2	7	12	24	36	48	61	137
W144	8	14	28	41	61	70	113
W146	6	11	20	27	42	47	94
W147	8	13	23	29	44	49	80
W148	6	11	22	29	37	41	82
